# Supplementary material
Source: PubMed Central journal article supplement (PMC4664871)
Supplement: EC.00101-15_zek999094498so1.pdf [file EC.00101-15_zek999094498so1.pdf]

## Supplemental Material for Publication

### Supplemental Materials and Methods

#### Lipid labeling

Strains were grown at 24°C in YPD and diluted into fresh media to an OD<sub>600</sub> of 0.5. Lipids were labeled by addition of 10 µCi/ml of [9,10-<sup>3</sup>H]palmitic acid (10 mCi/ml; American Radiolabeled Chemicals, St Louis, MO). 10 OD<sub>600</sub> units were withdrawn at each time point and cells were pelleted, washed and frozen. Cells were disrupted using glass beads and lipids were extracted with chloroform:methanol (1:1). Aliquots containing equal counts were dried and analyzed by thin layer chromatography (TLC) using silica gel 60 plates (Merck, Darmstadt, Germany), and the solvent system petroleum ether, diethyl ether and glacial acetic acid (70:30:2, v/v/v). Lipids were quantified by radio-TLC scanning (Tracemaster 20, Berthold Technologies, Bad Wildbad, Germany).

#### Sterol analysis

Lipids were extracted either from whole cells or from isolated microsomes. For total sterol analysis, steryl esters were hydrolyzed under alkaline conditions. Sterols were derivatized using N,O-bis-(trimethylsilyl)-trifluoroacetamide and analyzed on a Voyager Trace 2000 Series GC-MS (Thermo Fisher Scientific, Waltham, MA) equipped with a Zebron ZB-35 capillary column (35% phenyl-methyl polysiloxane; dimensions: 30 m x 0.25 mm x 0.25 mm film thickness) (1). Sterols were identified based on their retention time and their ion fragmentation pattern and quantified relative to cholesterol, which was added as an internal standard to the samples prior to lipid extraction.

#### References

1. **Quail, MA, Kelly, SL.** 1996. The extraction and analysis of sterols from yeast. *Methods Mol Biol* **53**:123–131.
2. **Winston, F, Dollard, C, Ricupero-Hovasse, SL.** 1995. Construction of a set of

convenient *Saccharomyces cerevisiae* strains that are isogenic to S288C. *Yeast* **11**:53–55.

3. **Hodge, CA, Choudhary, V, Wolyniak, MJ, Scarcelli, JJ, Schneider, R, Cole, CN.** 2010. Integral membrane proteins Brr6 and Apq12 link assembly of the nuclear pore complex to lipid homeostasis in the endoplasmic reticulum. *J Cell Sci* **123**:141–151.
4. **Jacquier, N, Choudhary, V, Mari, M, Toulmay, A, Reggiori, F, Schneider, R.** 2011. Lipid droplets are functionally connected to the endoplasmic reticulum in *Saccharomyces cerevisiae*. *J Cell Sci* **124**:2424–2437.
5. **Huh, WK, Falvo, JV, Gerke, LC, Carroll, AS, Howson, RW, Weissman, JS, O’Shea, EK.** 2003. Global analysis of protein localization in budding yeast. *Nature* **425**:686–691.

**Table S1. *S. cerevisiae* strains used in this study:**

| Name            | Relevant genotype                                                                                                                                                               | Source                      |
|-----------------|---------------------------------------------------------------------------------------------------------------------------------------------------------------------------------|-----------------------------|
| FY86 / RSY3360  | <i>MAT<math>\alpha</math> ura3-52 his3<math>\Delta</math>200 leu2<math>\Delta</math>1</i>                                                                                       | Winston et al., 1995<br>(2) |
| RSY4391         | <i>MAT<math>\alpha</math> ura3-52 his3<math>\Delta</math>200 leu2<math>\Delta</math>1<br/>brl1::NatMx pBRL1 (URA3/2<math>\mu</math>)</i>                                        | This study                  |
| SMY 1           | <i>MAT<math>\alpha</math> ura3-52 his3<math>\Delta</math>200 leu2<math>\Delta</math>1<br/>brl1::NatMx pBRL1/195 (URA3/2<math>\mu</math>)</i>                                    | This study                  |
| SMY 2 / RSY4392 | <i>MAT<math>\alpha</math> ura3-52 his3<math>\Delta</math>200 leu2<math>\Delta</math>1<br/>brl1::NatMx pBRL1-1(LEU2/CEN)</i>                                                     | This study                  |
| SMY 3 / RSY4393 | <i>MAT<math>\alpha</math> ura3-52 his3<math>\Delta</math>200 leu2<math>\Delta</math>1<br/>brl1::NatMx pBRL1-2(LEU2/CEN)</i>                                                     | This study                  |
| RSY4530         | <i>MAT<math>\alpha</math> ura3-52 his3<math>\Delta</math>200 leu2<math>\Delta</math>1<br/>brl1::NatMx pBRL1-1(LEU2)<br/>pHDEL-RFP(URA3)</i>                                     | This study                  |
| RSY4531         | <i>MAT<math>\alpha</math> ura3-52 his3<math>\Delta</math>200 leu2<math>\Delta</math>1<br/>brl1::NatMx pBRL1-2(LEU2)<br/>pHDEL-RFP(URA3)</i>                                     | This study                  |
| RSY4532         | <i>MAT<math>\alpha</math> ura3-52 his3<math>\Delta</math>200 leu2<math>\Delta</math>1<br/>brl1::NatMx pBRL1(URA3) pHDEL-<br/>RFP(LEU2)</i>                                      | This study                  |
| RSY4700         | <i>MAT<math>\alpha</math> ura3-52 his3<math>\Delta</math>200 leu2<math>\Delta</math>1<br/>brl1::NatMx pBRL1(URA3) pBRL1-<br/>1(LEU2)</i>                                        | This study                  |
| RSY4702         | <i>MAT<math>\alpha</math> ura3-52 his3<math>\Delta</math>200 leu2<math>\Delta</math>1<br/>brl1::NatMx pBRL1(URA3) pBRL1-<br/>2(LEU2)</i>                                        | This study                  |
| RSY4697         | <i>MAT<math>\alpha</math> ura3-52 his3<math>\Delta</math>200 leu2<math>\Delta</math>1<br/>brl1::NatMx pBRL1(URA3) pBRL1-<br/>1(LEU2) dga1<math>\Delta</math> lro1::hPh</i>      | This study                  |
| RSY4698         | <i>MAT<math>\alpha</math> ura3-52 his3<math>\Delta</math>200 leu2<math>\Delta</math>1<br/>brl1::NatMx pBRL1(URA3) pBRL1-<br/>2(LEU2) dga1<math>\Delta</math> lro1::hPh</i>      | This study                  |
| RSY4771         | <i>MAT<math>\alpha</math> ura3-52 his3<math>\Delta</math>200 leu2<math>\Delta</math>1<br/>brl1::NatMx pBRL1(URA3) pBRL1-<br/>1(LEU2) are1<math>\Delta</math> are2::lox-HIS3</i> | This study                  |
| RSY4772         | <i>MAT<math>\alpha</math> ura3-52 his3<math>\Delta</math>200 leu2<math>\Delta</math>1<br/>brl1::NatMx pBRL1(URA3) pBRL1-<br/>2(LEU2) are1<math>\Delta</math> are2::lox-HIS3</i> | This study                  |
| RSY3363         | <i>MAT<math>\alpha</math> ura3<math>\Delta</math>0 his3<math>\Delta</math> leu2<math>\Delta</math>0 lys2<br/>apq12::KanMx</i>                                                   | Hodge et al., 2010<br>(3)   |
| MWY 2/RSY3361   | <i>MAT<math>\alpha</math> ura3-1 his3-11,15 trp1-1 leu2-<br/>3,112 ade2-1 brr6::HIS3 pBRR6-<br/>1(LEU2)</i>                                                                     | Hodge et al., 2010<br>(3)   |
| MWY 1           | <i>MAT<math>\alpha</math> ura3-52 his3<math>\Delta</math>200 leu2<math>\Delta</math>1<br/>trp1<math>\Delta</math>63 brr6::HIS3 pBRR6<br/>(URA3/CEN)</i>                         | Hodge et al., 2010<br>(3)   |

|                   |                                                                                                                                                                                                                  |                              |
|-------------------|------------------------------------------------------------------------------------------------------------------------------------------------------------------------------------------------------------------|------------------------------|
| RSY5171           | <i>MAT<math>\alpha</math> ura3-52 his3<math>\Delta</math>200 leu2<math>\Delta</math>1<br/>brl1::NatMx pBRL1-1(LEU2)<br/>pAPQ12(URA3)</i>                                                                         | This study                   |
| RSY5172           | <i>MAT<math>\alpha</math> ura3-52 his3<math>\Delta</math>200 leu2<math>\Delta</math>1<br/>brl1::NatMx pBRL1-2(LEU2)<br/>pAPQ12(URA3)</i>                                                                         | This study                   |
| RSY5173           | <i>MAT<math>\alpha</math> ura3-1 his3-11,15 trp1-1 leu2-<br/>3,112 ade2-1 brr6::HIS3 pBRR6-<br/>1(LEU2) pAPQ12(URA3)</i>                                                                                         | This study                   |
| RSY5174           | <i>MAT<math>\alpha</math> ura3<math>\Delta</math>0 his3 leu2<math>\Delta</math>0 lys2<math>\Delta</math>0<br/>apq12::KanMx pBRL1(URA3)</i>                                                                       | This study                   |
| RSY5249           | <i>MAT<math>\alpha</math> ura3-52 his3<math>\Delta</math>200 leu2<math>\Delta</math>1<br/>brl1::NatMx pBRL1-1(LEU2)<br/>pBRR6(URA3)</i>                                                                          | This study                   |
| RSY5250           | <i>MAT<math>\alpha</math> ura3-52 his3<math>\Delta</math>200 leu2<math>\Delta</math>1<br/>brl1::NatMx pBRL1-2(LEU2)<br/>pBRR6(URA3)</i>                                                                          | This study                   |
| RSY5251           | <i>MAT<math>\alpha</math> ura3<math>\Delta</math>0 his3<math>\Delta</math> leu2<math>\Delta</math>0 lys2<math>\Delta</math>0<br/>apq12::KanMx pBRR6(URA3)</i>                                                    | This study                   |
| RSY1826           | <i>MAT<math>\alpha</math> ura3<math>\Delta</math>0 his3<math>\Delta</math> leu2<math>\Delta</math>0 lys2<math>\Delta</math>0<br/>are2::KanMx are1::HIS5</i>                                                      | Jacquier et al., 2011<br>(4) |
| RSY3290           | <i>MAT<math>\alpha</math> ura3<math>\Delta</math>0 his3<math>\Delta</math> leu2<math>\Delta</math>0 lys2<math>\Delta</math>0<br/>lro1::KanMx dga1<math>\Delta</math></i>                                         | Jacquier et al., 2011<br>(4) |
| RSY3077           | <i>MAT<math>\alpha</math> ura3<math>\Delta</math>0 his3<math>\Delta</math> leu2<math>\Delta</math>0 lys2<math>\Delta</math>0<br/>are2::KanMx are1::KanMx lro1<math>\Delta</math><br/>dga1<math>\Delta</math></i> | Jacquier et al., 2011<br>(4) |
| Nup60-GFP         | <i>MAT<math>\alpha</math> ura3<math>\Delta</math>0 his3<math>\Delta</math> leu2<math>\Delta</math>0 met15<math>\Delta</math>0<br/>NUP60-GFP::KanMx</i>                                                           | Invitrogen                   |
| Nup82-GFP         | <i>MAT<math>\alpha</math> ura3<math>\Delta</math>0 his3<math>\Delta</math> leu2<math>\Delta</math>0 met15<math>\Delta</math>0<br/>NUP82-GFP::KanMx</i>                                                           | Invitrogen                   |
| CSY 699           | <i>MAT<math>\alpha</math> ura3-53 his3<math>\Delta</math>200 leu2<math>\Delta</math>0<br/>brl1::KanMx NUP82-GFP::KanMx<br/>pBRL1(URA3/CEN)</i>                                                                   | This study                   |
| CSY 701           | <i>MAT<math>\alpha</math> ura3-53 his3<math>\Delta</math>200 leu2<math>\Delta</math>0<br/>brl1::KanMx NUP60-GFP::KanMx<br/>pBRL1(URA3/CEN)</i>                                                                   | This study                   |
| CSY 699 + pBRL1-1 | <i>MAT<math>\alpha</math> ura3-53 his3<math>\Delta</math>200 leu2<math>\Delta</math>0<br/>brl1::KanMx NUP82-GFP::KanMx<br/>pBRL1-1(LEU2/CEN)</i>                                                                 | This study                   |
| CSY 699 + pBRL1-2 | <i>MAT<math>\alpha</math> ura3-53 his3<math>\Delta</math>200 leu2<math>\Delta</math>0<br/>brl1::KanMx NUP82-GFP::KanMx<br/>pBRL1-2(LEU2/CEN)</i>                                                                 | This study                   |
| CSY 701 + pbrl1-1 | <i>MAT<math>\alpha</math> ura3-53 his3<math>\Delta</math>200 leu2<math>\Delta</math>0<br/>brl1::KanMx NUP60-GFP::KanMx<br/>pBRL1-1(LEU2 CEN)</i>                                                                 | This study                   |
| CSY 701 + pbrl1-2 | <i>MAT<math>\alpha</math> ura3-53 his3<math>\Delta</math>200 leu2<math>\Delta</math>0<br/>brl1::KanMx NUP60-GFP::KanMx<br/>pBRL1-2(LEU2/CEN)</i>                                                                 | This study                   |

|                  |                                                                                                                                                                             |                      |
|------------------|-----------------------------------------------------------------------------------------------------------------------------------------------------------------------------|----------------------|
| JSY053           | <i>MAT<math>\alpha</math> ura3-52 his3<math>\Delta</math>200 leu2<math>\Delta</math>1 HIS3MX6-PGAL1-GFP::APQ12</i>                                                          | This study           |
| JSY093           | <i>MAT<math>\alpha</math> ura3<math>\Delta</math> his3<math>\Delta</math>1 leu2<math>\Delta</math> lys2<math>\Delta</math> BRR6::13MYC-kanMX6</i>                           | This study           |
| AAY031           | <i>MAT<math>\alpha</math> ura3-52 his3<math>\Delta</math>200 leu2<math>\Delta</math>1 kanMX6-PGAL1-HA::BRL1 kanMX6-PGAL1-HA::BRR6</i>                                       | This study           |
| AAY044           | <i>MAT<math>\alpha</math> ura3-52 his3<math>\Delta</math>200 leu2<math>\Delta</math>1 HIS3MX6-PGAL1-GFP::APQ12 kanMX6-PGAL1-HA::BRL1 kanMX6-PGAL1-HA::BRR6</i>              | This study           |
| AAY080           | <i>MAT<math>\alpha</math> ura3-52 his3<math>\Delta</math>200 leu2<math>\Delta</math>1 BRR6::13MYC-kanMX6 kanMX6-PGAL1-HA::BRL1</i>                                          | This study           |
| AAY082           | <i>MAT<math>\alpha</math> ura3-52 his3<math>\Delta</math>200 leu2<math>\Delta</math>1 BRR6::13MYC-kanMX6 kanMX6-PGAL1HA::BRL1 apq12::CaURA3</i>                             | This study           |
| RSY5373          | <i>MAT<math>\alpha</math> ura3<math>\Delta</math>0 his3<math>\Delta</math>1 leu2<math>\Delta</math>0 met15<math>\Delta</math>0 BRL1-GFP::HIS3MX6</i>                        | Huh et al., 2003 (5) |
| RSY5374          | <i>MAT<math>\alpha</math> ura3<math>\Delta</math>0 his3<math>\Delta</math>1 leu2<math>\Delta</math>0 met15<math>\Delta</math>0 APQ12-GFP::HIS3MX6</i>                       | Huh et al., 2003 (5) |
| RSY5375          | <i>MAT<math>\alpha</math> ura3<math>\Delta</math>0 his3<math>\Delta</math>1 leu2<math>\Delta</math>0 met15<math>\Delta</math>0 NUP84-GFP::HIS3MX6</i>                       | Huh et al., 2003 (5) |
| RSY5376          | <i>MAT<math>\alpha</math> ura3<math>\Delta</math>0 his3<math>\Delta</math>1 leu2<math>\Delta</math>0 met15<math>\Delta</math>0 BRR6-GFP::HIS3MX6</i>                        | Huh et al., 2003 (5) |
| SWY184 / RSY5412 | <i>MAT<math>\alpha</math> ura3-52 his3<math>\Delta</math>200 leu2-3,112 SPC42-mCHERRY::kanMX6</i>                                                                           | S. Westermann        |
| RSY5444          | <i>MAT<math>\alpha</math> ura3<math>\Delta</math>0 his3<math>\Delta</math>1 leu2<math>\Delta</math>0 met15<math>\Delta</math>0 APQ12-GFP::HIS3MX6 SPC42-mCHERRY::kanMX6</i> | This study           |
| RSY5446          | <i>MAT<math>\alpha</math> ura3<math>\Delta</math>0 his3<math>\Delta</math>1 leu2<math>\Delta</math>0 met15<math>\Delta</math>0 NUP84-GFP::HIS3MX6 SPC42-mCHERRY::kanMX6</i> | This study           |
| RSY5449          | <i>MAT<math>\alpha</math> ura3<math>\Delta</math>0 his3<math>\Delta</math>1 leu2<math>\Delta</math>0 met15<math>\Delta</math>0 APQ12-GFP::HIS3MX6 BRL1-mCHERRY::kanMX6</i>  | This study           |
| RSY5450          | <i>MAT<math>\alpha</math> ura3<math>\Delta</math>0 his3<math>\Delta</math>1 leu2<math>\Delta</math>0 met15<math>\Delta</math>0 NUP84-GFP::HIS3MX6 BRL1-mCHERRY::kanMX6</i>  | This study           |
| RSY5451          | <i>MAT<math>\alpha</math> ura3<math>\Delta</math>0 his3<math>\Delta</math>1 leu2<math>\Delta</math>0 met15<math>\Delta</math>0 BRR6-GFP::HIS3MX6 BRL1-mCHERRY::kanMX6</i>   | This study           |
| Nup120 $\Delta$  | <i>MAT<math>\alpha</math> ura3<math>\Delta</math>0 his3<math>\Delta</math>1 leu2<math>\Delta</math>0 lys2<math>\Delta</math>0 nup120<math>\Delta</math>::kanMX4</i>         | Euroscarf            |
| RSY5488          | <i>MAT? ura3<math>\Delta</math>0 his3<math>\Delta</math>1 leu2<math>\Delta</math>0 nup120<math>\Delta</math>::kanMX4 APQ12-GFP::HIS3MX6</i>                                 | This study           |
| RSY5490          | <i>MAT? ura3<math>\Delta</math>0 his3<math>\Delta</math>1 leu2<math>\Delta</math>0 nup120<math>\Delta</math>::kanMX4 BRL1-</i>                                              | This study           |

|         |                                                                                                                                   |            |
|---------|-----------------------------------------------------------------------------------------------------------------------------------|------------|
|         | <i>GFP::HIS3MX6</i>                                                                                                               |            |
| RSY5492 | <i>MAT?</i> <i>ura3Δ0</i> <i>his3Δ1</i> <i>leu2Δ0</i><br><i>nup120Δ::kanMX4</i> <i>NUP84-</i><br><i>GFP::HIS3MX6</i>              | This study |
| RSY5539 | <i>MATα</i> <i>BRL1-GFP::HIS3MX6</i><br><i>SPC42-mCHERRY::kanMX6</i>                                                              | This study |
| RSY5448 | <i>MATα</i> <i>BRR6-GFP::HIS3MX6</i> <i>SPC42-</i><br><i>mCHERRY::kanMX6</i>                                                      | This study |
| RSY5541 | <i>MAT?</i> <i>ura3Δ0</i> <i>his3Δ1</i> <i>leu2Δ0</i><br><i>nup120Δ::kanMX4</i> <i>BRR6-</i><br><i>GFP::HIS3MX6</i>               | This study |
| RSY5544 | <i>MAT?</i> <i>ura3Δ0</i> <i>his3Δ1</i> <i>leu2Δ0</i> <i>Nup84-</i><br><i>GFP::HIS3MX6</i> <i>BRR6-</i><br><i>mCHERRY::kanMX6</i> | This study |
| RSY5546 | <i>MAT?</i> <i>ura3Δ0</i> <i>his3Δ1</i> <i>leu2Δ0</i> <i>APQ12-</i><br><i>GFP::HIS3MX6</i> <i>BRR6-</i><br><i>mCHERRY::kanMX6</i> | This study |
| RSY5554 | <i>MATα</i> <i>ura3Δ0</i> <i>his3Δ1</i> <i>leu2Δ0</i> <i>BRL1-</i><br><i>GFP::HIS3MX6</i> <i>BRR6-</i><br><i>mCHERRY::kanMX6</i>  | This study |
| RSY5735 | <i>MATα</i> <i>BRL1-GFP::HIS3MX6</i> <i>SPC42-</i><br><i>mCHERRY::kanMX6</i> <i>pGAL-HO-</i><br><i>URA3</i>                       | This study |

### Supplementary figure legends

**Figure S1. *brl1* mutants have elevated levels of total sterols and accumulate sterol precursors.** (A) *brl1* mutant cells accumulate ergosterol and sterol precursors, episterol, zymosterol, and lanosterol (B). Cells were grown at 24°C overnight in YPD medium. Lipids were hydrolyzed under alkaline conditions and total sterols, composed of free sterols and of steryl esters, were quantified by GC-MS using cholesterol as an internal standard. Values are normalized to those of wild-type cells and represent mean  $\pm$ SD of two independent experiments.

**Figure S2. Defects in sterol homeostasis of *brl1* mutant cells are restored by overexpression of *BRR6* or *APQ12*.** Strains of indicated genotypes bearing a vector control or a wild-type copy of *BRR6* (pBRR6), *BRL1* (pBRL1), or *APQ12* (pAPQ12) on a high-copy number plasmid were cultivated in SC medium and total sterols were analyzed by GC-MS. Overexpression of *BRR6* and *APQ12* leads to reduction in ergosterol and episterol levels in *brl1-1* (A, B), and *brl1-2* (C, D), as does the overexpression of *BRL1* or *APQ12* in *brr6* cells (E, F). Values are normalized to those of wild-type cells and represent mean  $\pm$ SD of two independent experiments.

**Figure S3. Elevated synthesis of steryl esters in *brl1*.** Incorporation of [<sup>3</sup>H]-palmitic acid into steryl esters (STE) in *brl1-1* and *brl1-2* cells. Strains were pre cultured in YPD media and lipids were radiolabeled with [<sup>3</sup>H]-palmitic acid (10  $\mu$ Ci/ml) for the indicated period of time. Lipids were extracted, separated by TLC and quantified by radioscanning. The fraction of [<sup>3</sup>H]-palmitic acid incorporated into STE is plotted [%]. Values are mean  $\pm$ SD of two independent experiments.

**Figure S4. Recovery of wild-type and *brl1-1* mutant cells from treatment with BA.** Cells were cultivated at 24°C and treated with BA (0.2%) for 5 h. Cells were washed with fresh medium and re-cultivated for another 5 h or 10 h. Lipids were extracted and fatty acid profiles were recorded by GC and plotted relative to the levels present at the zero time point. Values are mean  $\pm$ SD of three independent experiments.

**Figure S5. Transient colocalization of Brr6 and Brl1 with the SPB.** Cells were treated with alpha factor (10  $\mu\text{g/ml}$  for 2 h), the pheromone was washed out and colocalization of Brr6-GFP or Brl1-GFP with the SPB marker, Spc42, was analyzed in synchronized cells by microscopy. Bar, 5  $\mu\text{m}$ .

**Figure S6. Localization of Brl1, Brr6, and Apq12 in cells treated with BA.** Strains bearing the indicated fluorescently tagged proteins were cultivated in SC media and treated with BA (0.2%) for 2 h or 4 h prior to microscopic analysis of their subcellular distribution. Bar, 5  $\mu\text{m}$ .



**A**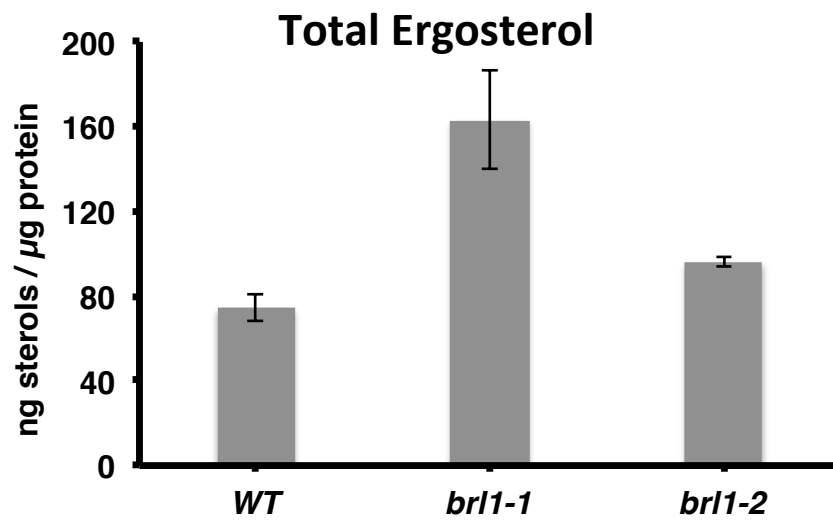**B**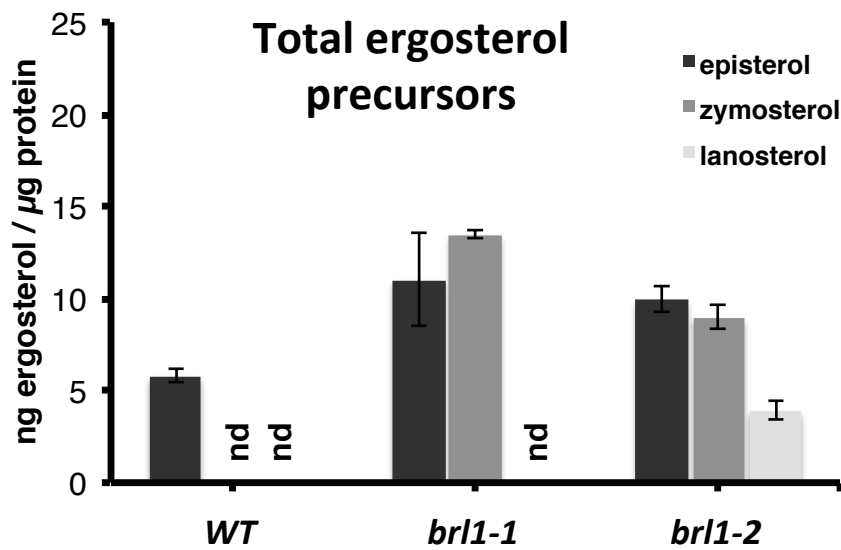**Figure S1**

**A**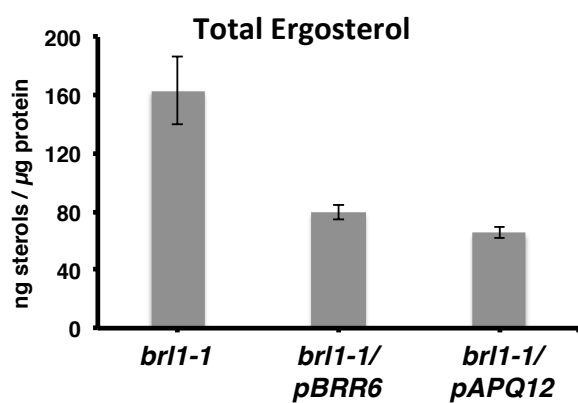**B**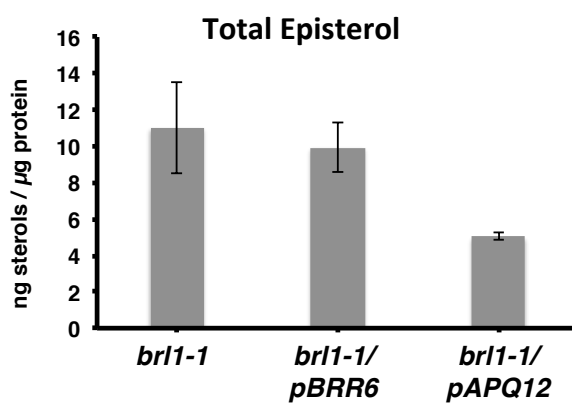**C**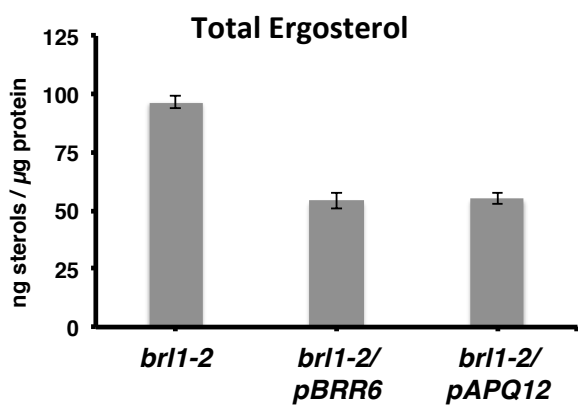**D**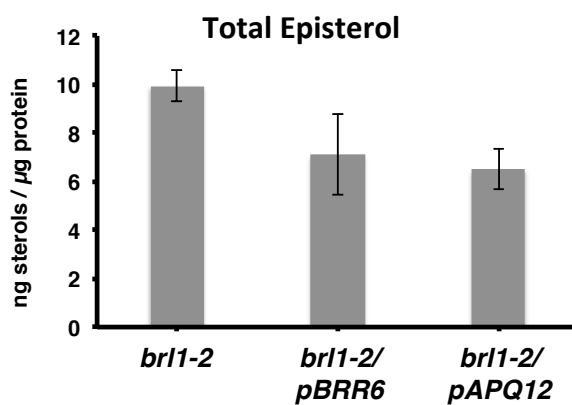**E**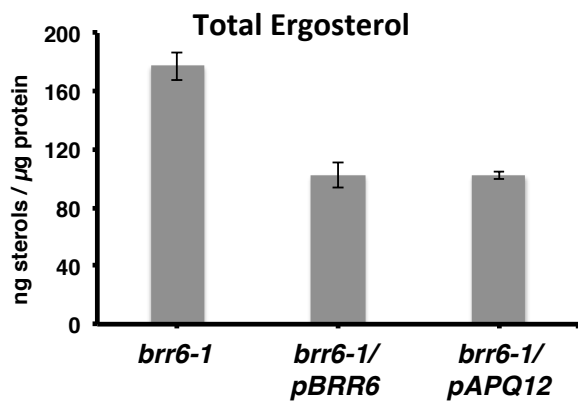**F**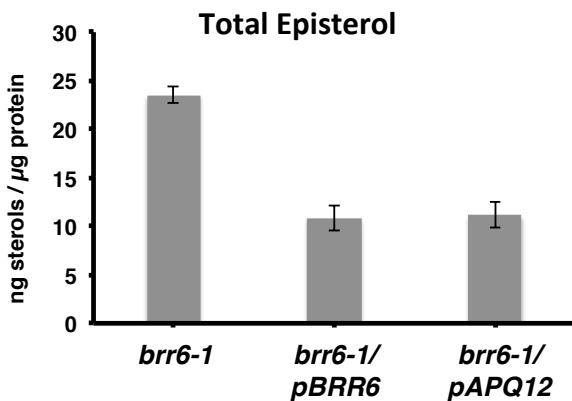**Figure S2**

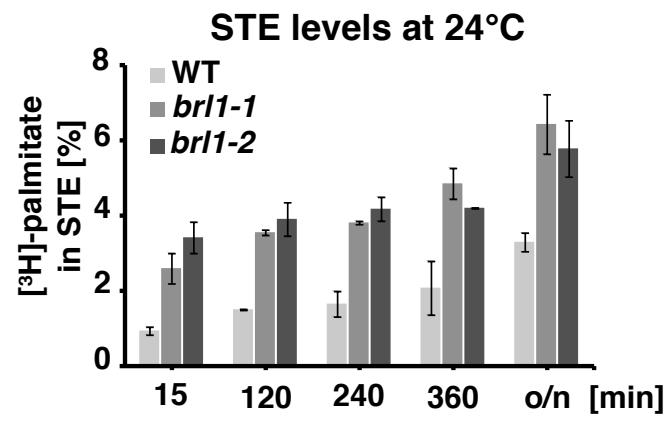

Figure S3

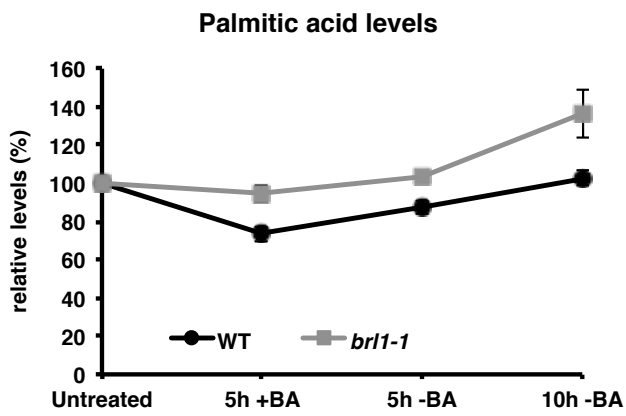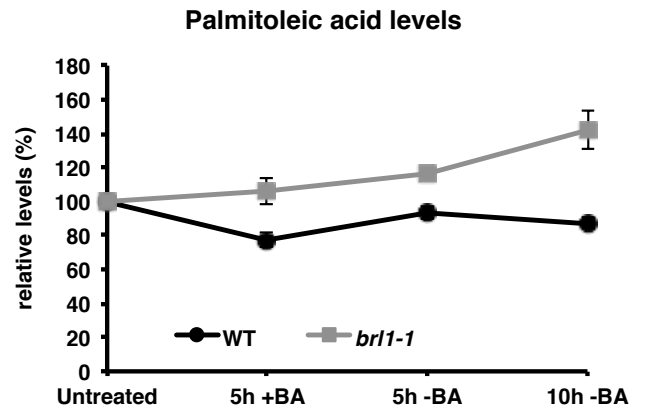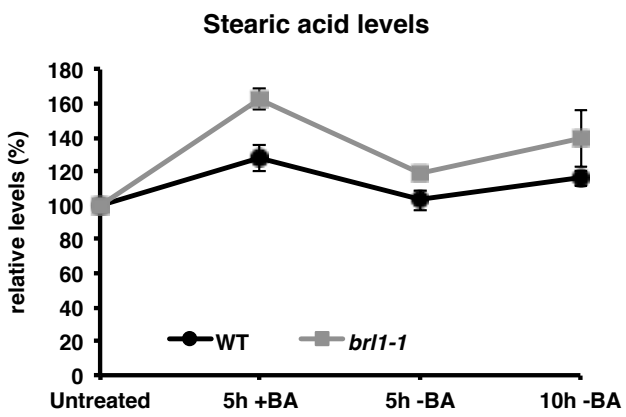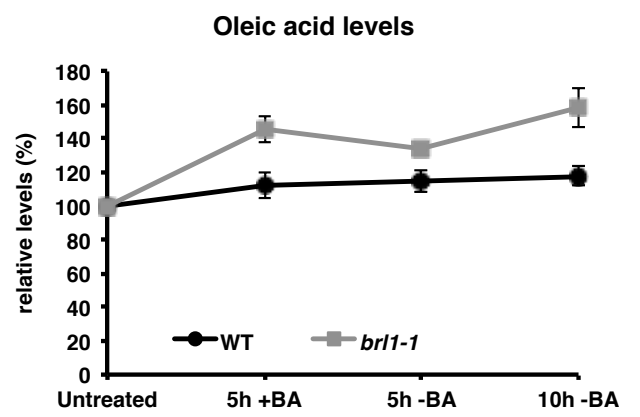

**Figure S4**

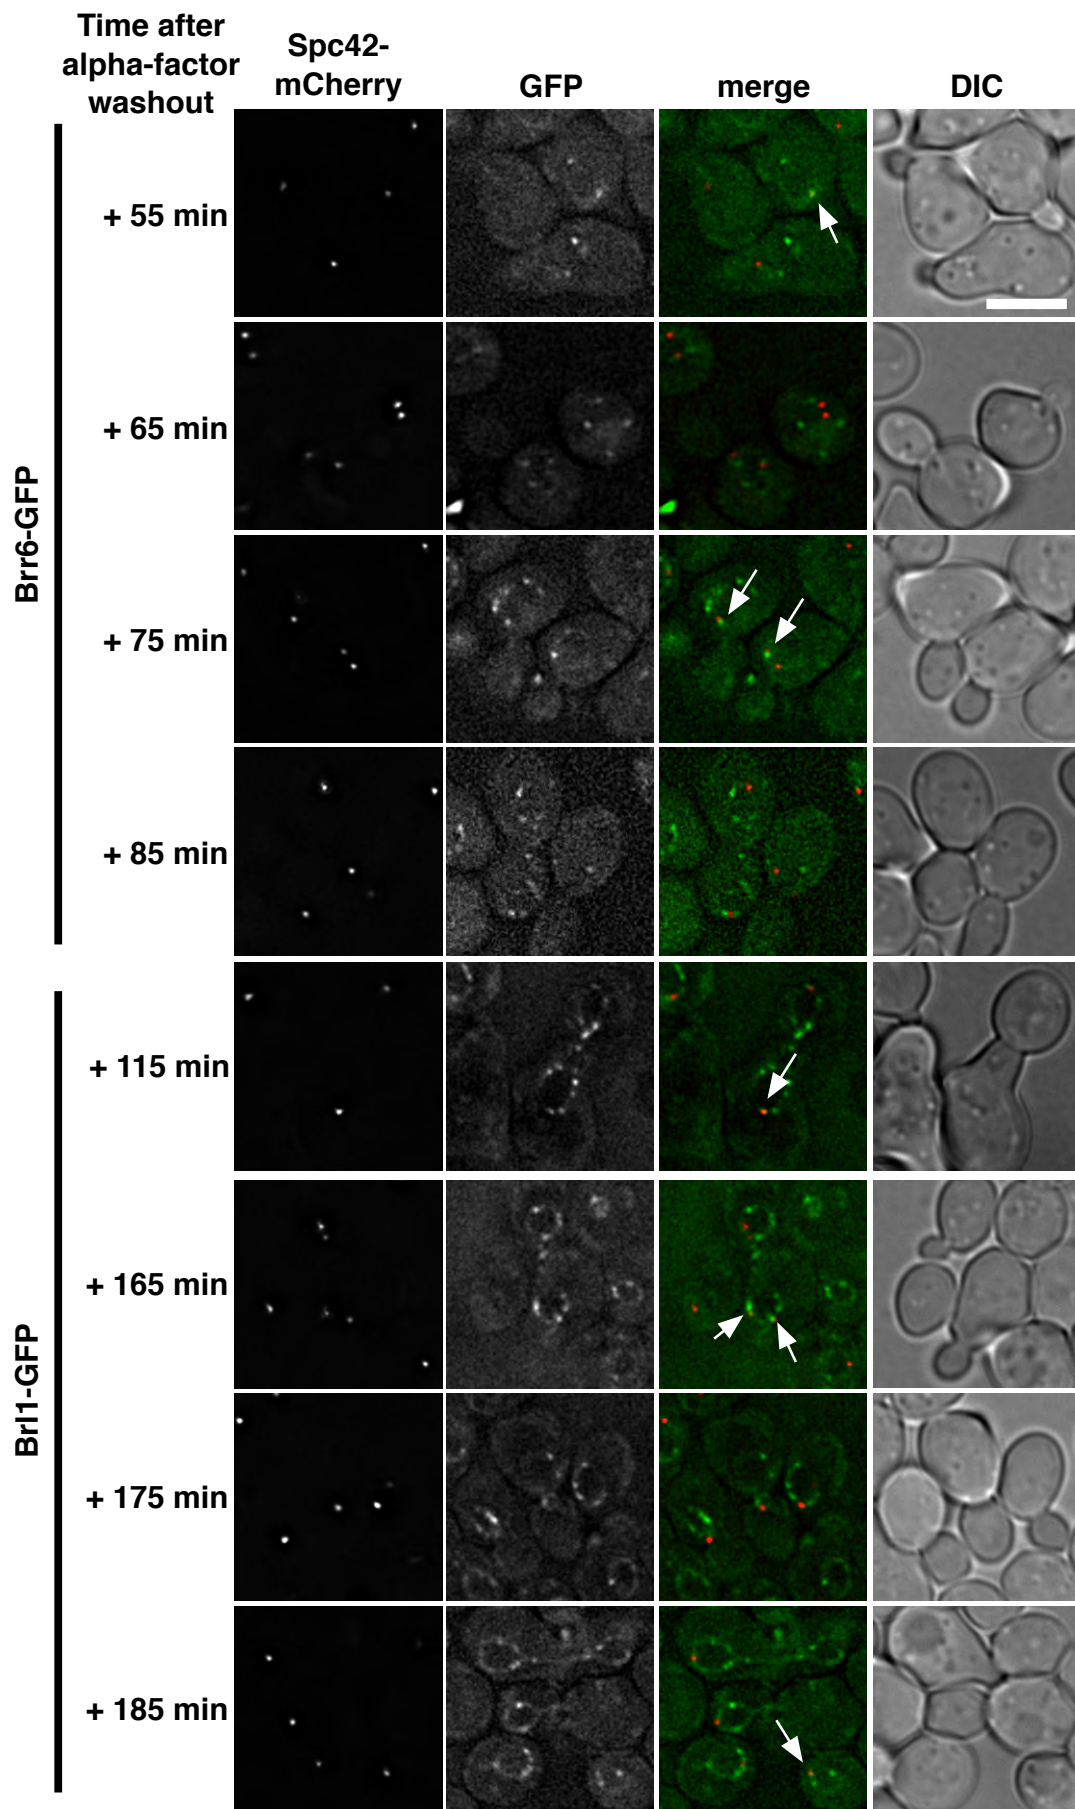

**Figure S5**

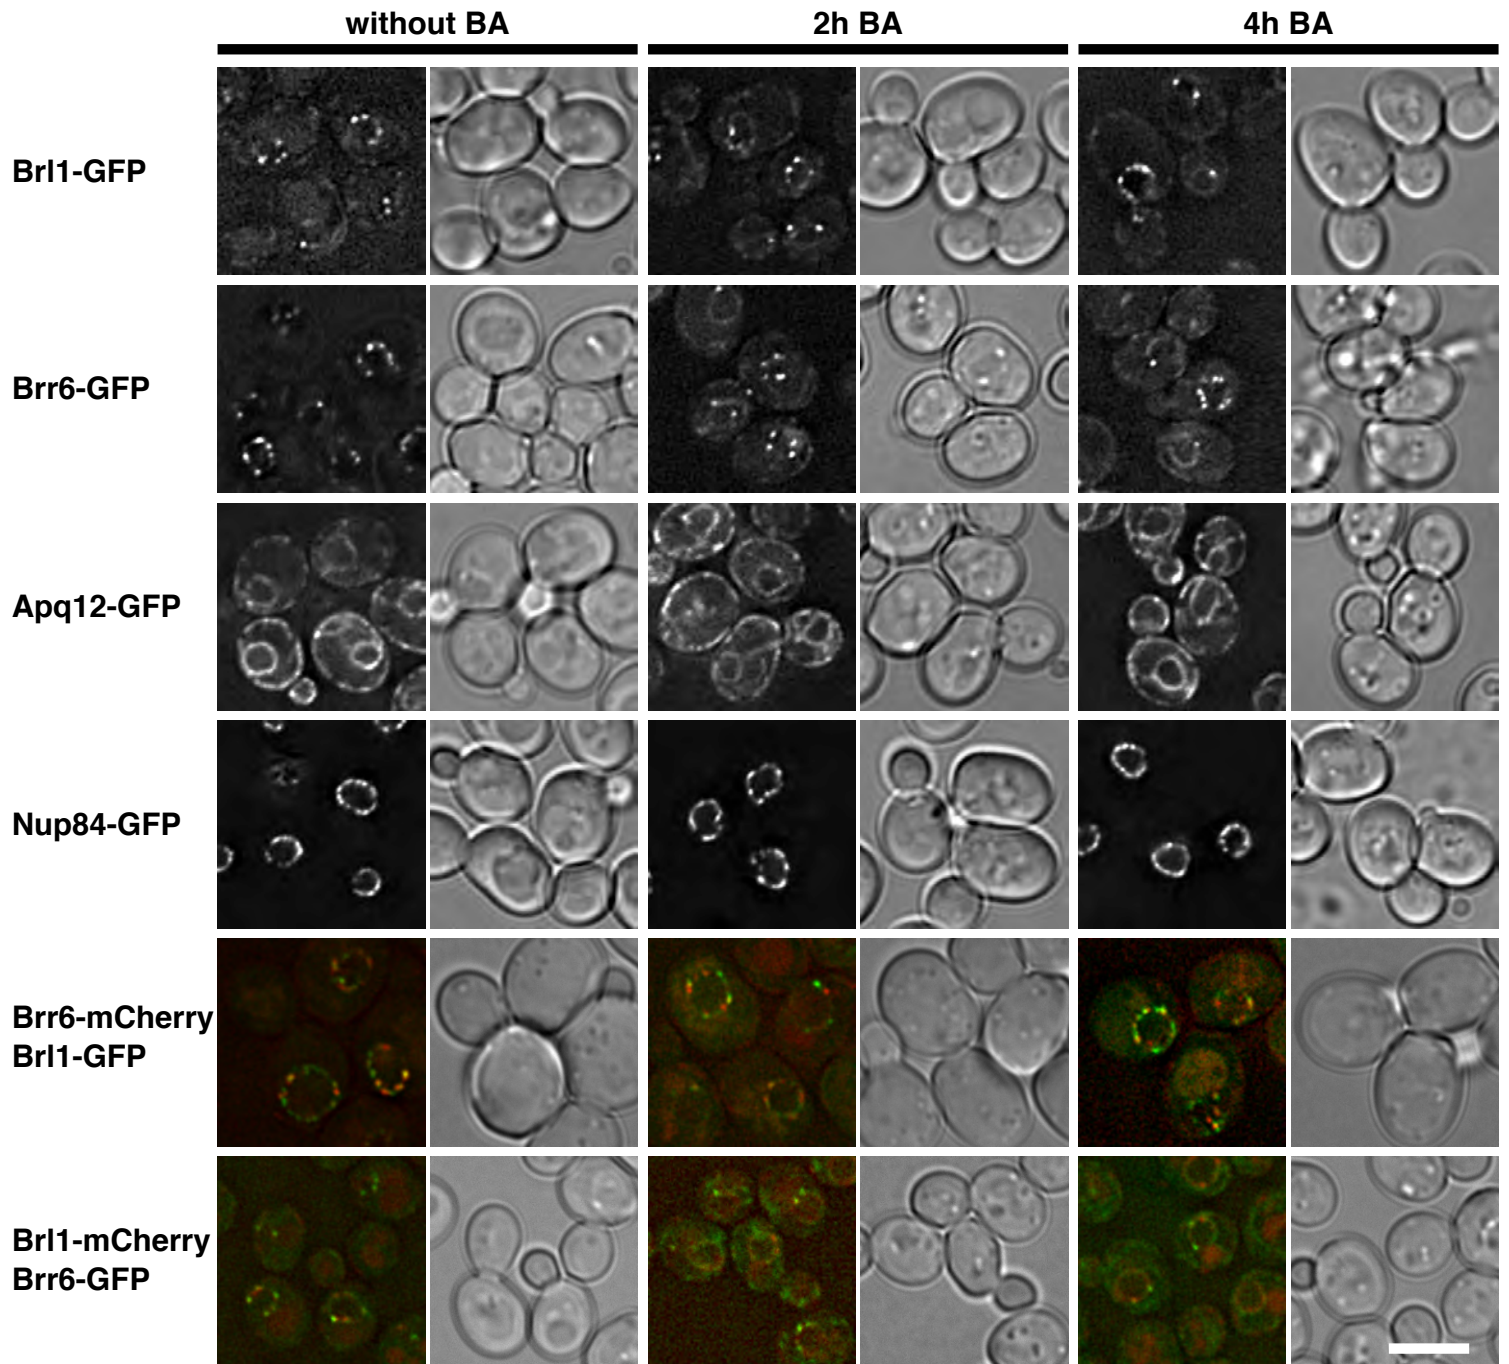

**Figure S6**
